# Supplementary material for: Novel subgroups of type 2 diabetes and their association with microvascular outcomes in an Asian Indian population: a data-driven cluster analysis: the INSPIRED study
Source: PubMed Central journal article supplement (PMC7437708; doi:10.1136/bmjdrc-2020-001506), 2020-08-17
Supplement: bmjdrc-2020-001506supp001.pdf [file bmjdrc-2020-001506supp001.pdf]

**A.**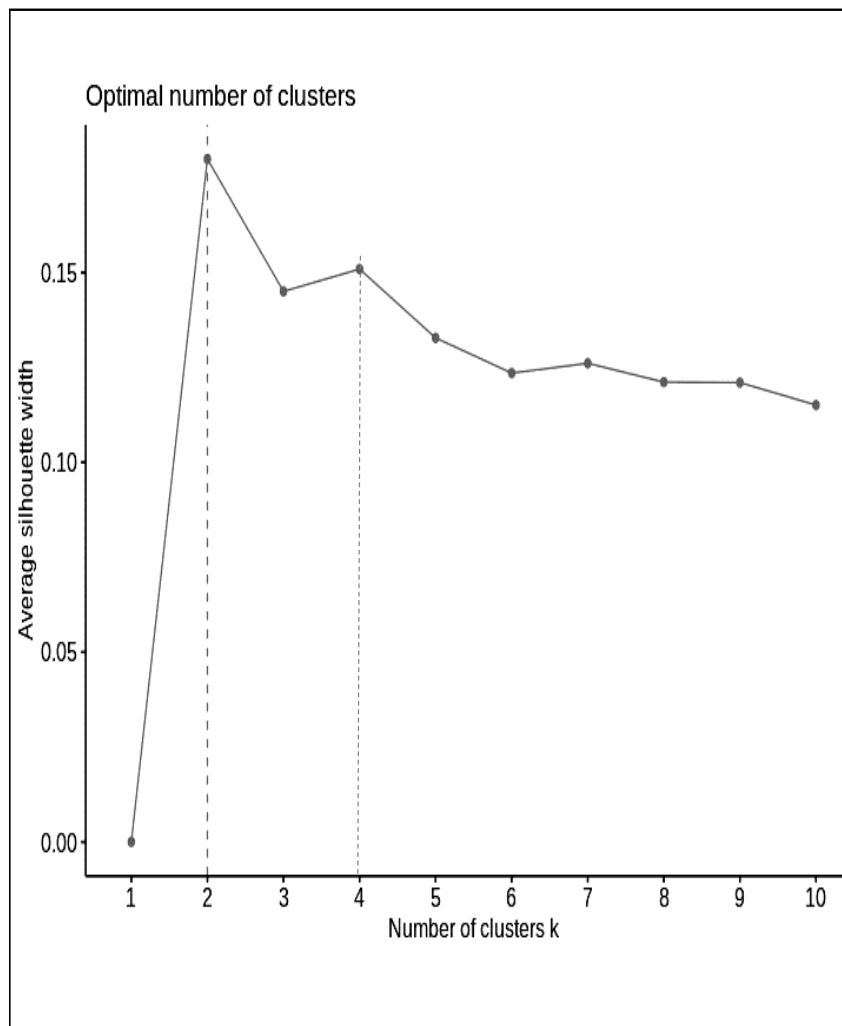**B.**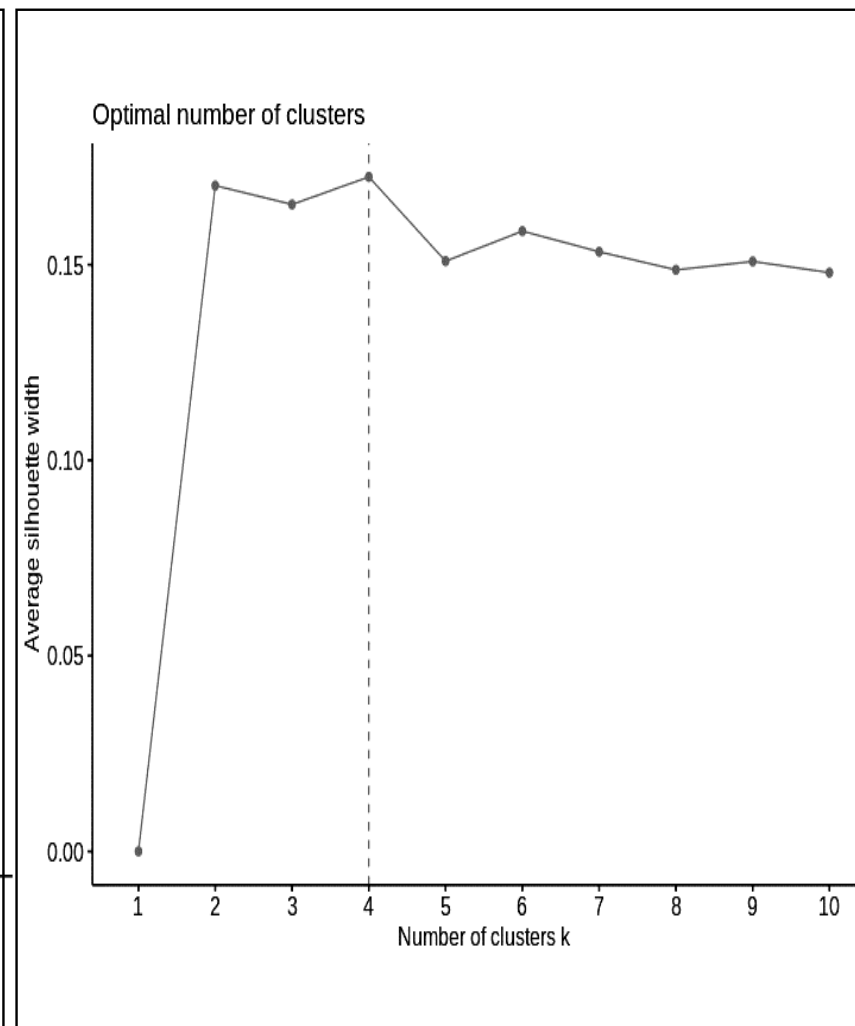

**Supplemental Figure S1. Optimal number of clusters based on silhouette width (A) DEMR (B) INDIAB Study**

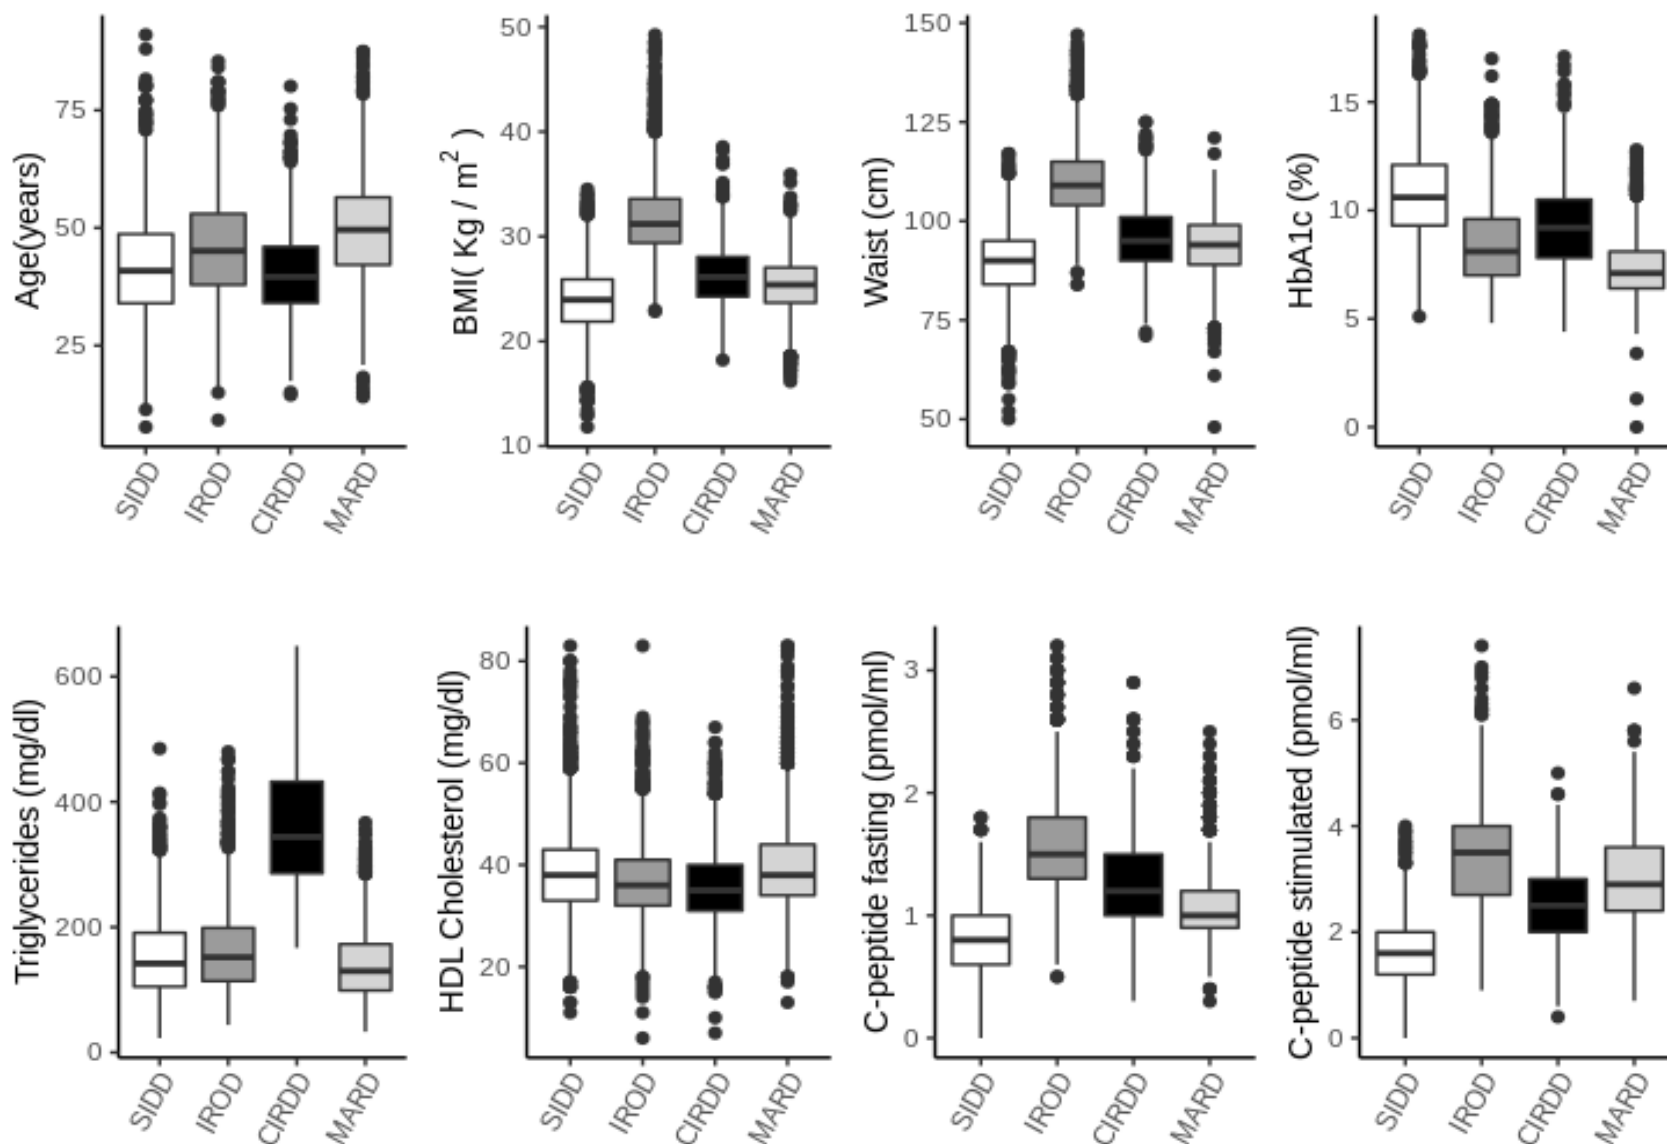

Supplemental Figure S2a. Male patient cluster characteristics

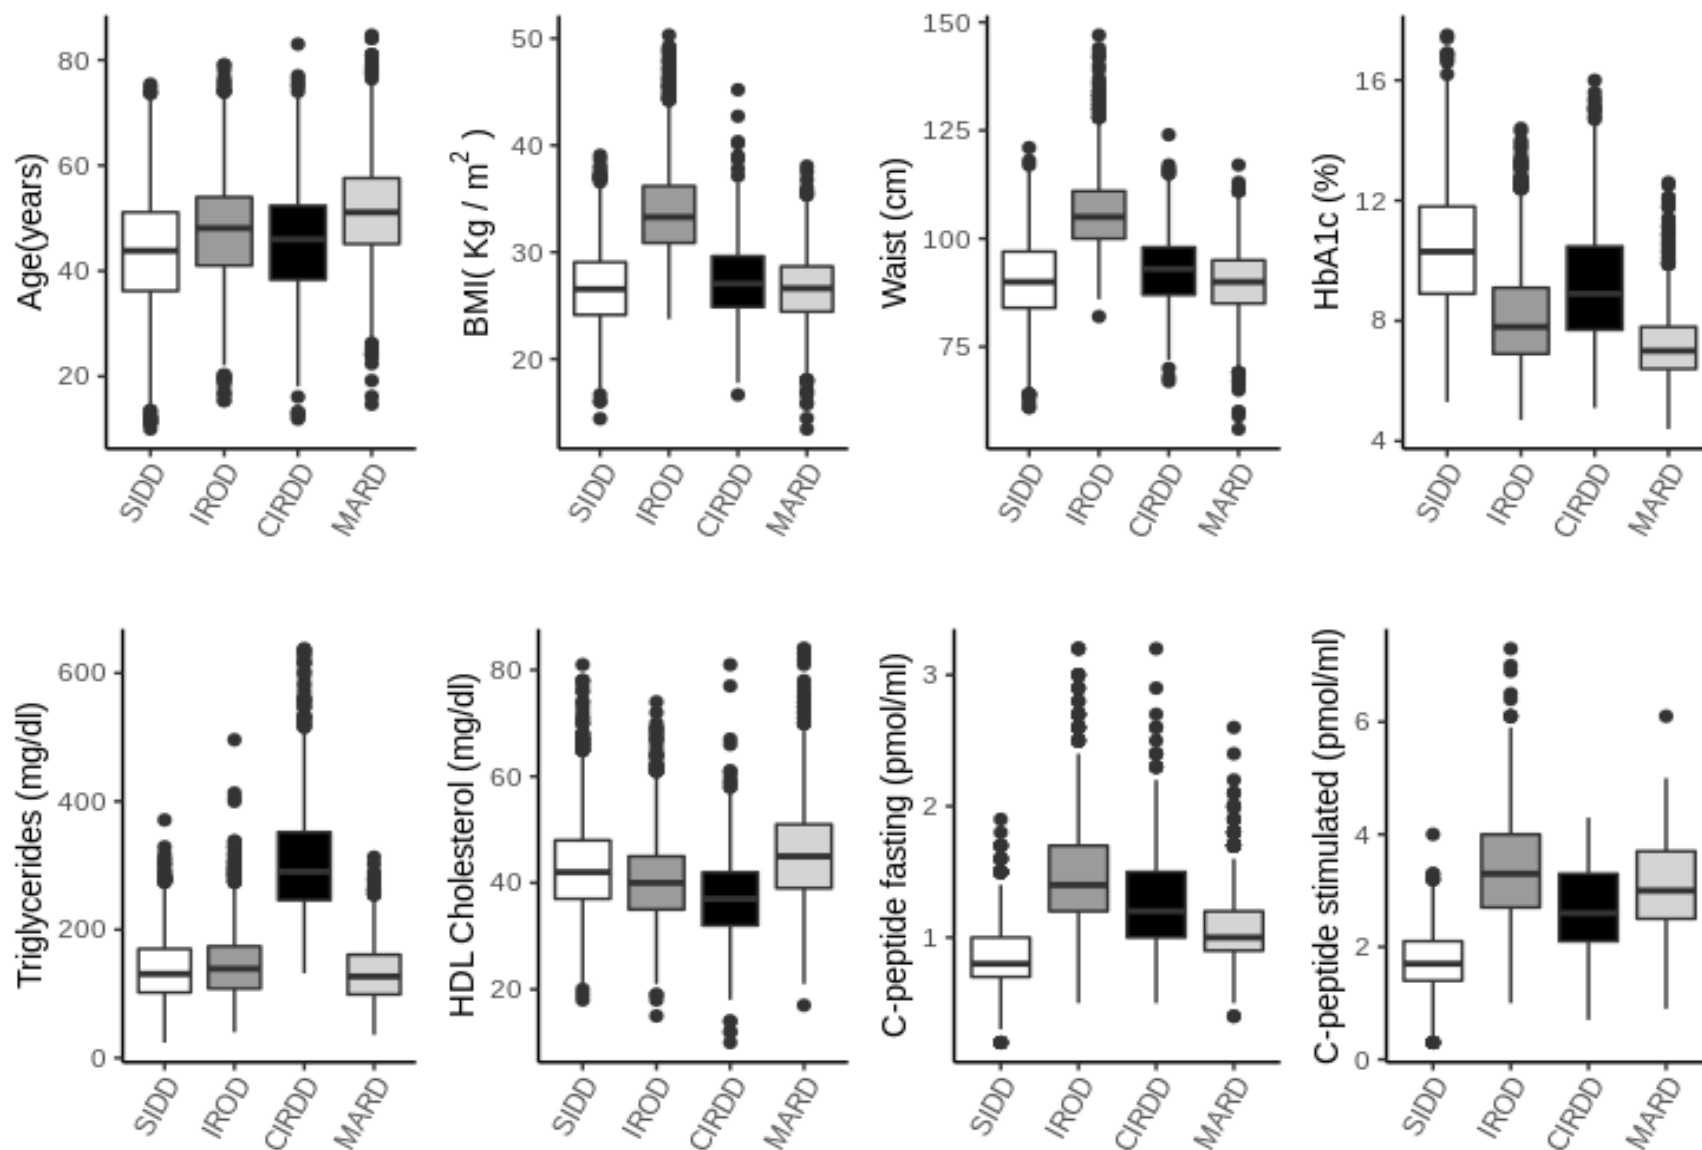**Supplemental FigureS2b. Female patient cluster characteristics**

## Legend to figures:

**Supplemental Figure S1.** Optimal number of clusters based on silhouette width. (A)

DEMR. (B) INDIAB Study

**Supplemental Figure S2a.** Male patient cluster characteristics

**Supplemental Figure S2b.** Female patient cluster characteristics
