# Supplementary material for: Novel subgroups of type 2 diabetes and their association with microvascular outcomes in an Asian Indian population: a data-driven cluster analysis: the INSPIRED study
Source: PubMed Central journal article supplement (PMC7437708; doi:10.1136/bmjdrc-2020-001506), 2020-08-17
Supplement: bmjdrc-2020-001506supp002.pdf [file bmjdrc-2020-001506supp002.pdf]

Supplemental Table S1 : Cluster-wise phenotype characteristics of male and female patient group

|                                      | Cluster 1 (SIDD) |              | Cluster 2 (IROD) |              | Cluster 3 (CIRDD) |              | Cluster 4 (MARD) |              |
|--------------------------------------|------------------|--------------|------------------|--------------|-------------------|--------------|------------------|--------------|
|                                      | Male             | Female       | Male             | Female       | Male              | Female       | Male             | Female       |
| Gender                               |                  |              |                  |              |                   |              |                  |              |
| N                                    | 3116             | 1910         | 2921             | 1971         | 1472              | 902          | 4439             | 2353         |
| Frequency, %                         | 26.1             | 26.8         | 24.4             | 27.6         | 12.3              | 12.6         | 37.2             | 33           |
| <b>Age at diagnosis, years</b>       | 41.8 (10.5)      | 43.5 (11.1)  | 45.6 (10.6)      | 47.6 (10)    | 40.6 (9)          | 45.4 (10.6)  | 49.7 (10.5)      | 51.3 (9.9)   |
| <b>BMI, kg/m<sup>2</sup></b>         | 24 (3.1)         | 26.6 (3.7)   | 31.8 (3.7)       | 33.9 (4.3)   | 26.2 (2.9)        | 27.3 (3.6)   | 25.3 (2.5)       | 26.6 (3.2)   |
| <b>Waist Circumference, cm</b>       | 89.5 (8.4)       | 90.4 (9.1)   | 109.8 (8.6)      | 105.9 (8.8)  | 95.6 (7.7)        | 92.8 (8.2)   | 94.0 (6.8)       | 89.9 (7.6)   |
| <b>Glycated hemoglobin, %</b>        | 10.7 (2.1)       | 10.4 (2.1)   | 8.4 (1.8)        | 8.1 (1.7)    | 9.2 (1.9)         | 9.2 (2.0)    | 7.3 (1.3)        | 7.2 (1.2)    |
| <b>Glycated hemoglobin, mmol/mol</b> | 93.0             | 90.0         | 68.0             | 65.0         | 77.0              | 77.0         | 56.0             | 55.0         |
| <b>Serum triglycerides, mg/dl</b>    | 153.1 (62.7)     | 138.2 (50.3) | 162.4 (65.8)     | 145.7 (51.3) | 367.1 (105.3)     | 308.3 (92.2) | 139.7 (53.8)     | 132.8 (45.8) |
| <b>HDL Cholesterol, mg/dl</b>        | 38.7 (8.5)       | 42.9 (9.1)   | 36.8 (7.3)       | 40.3 (8)     | 35.7 (7.4)        | 37.7 (7.8)   | 39.3 (8.2)       | 45.6 (9.1)   |
| <b>C-peptide fasting, pmol/ml</b>    | 0.8 (0.3)        | 0.8 (0.3)    | 1.5 (0.4)        | 1.5 (0.4)    | 1.2 (0.4)         | 1.3 (0.4)    | 1.1 (0.3)        | 1.1 (0.3)    |
| <b>C-peptide stimulated, pmol/ml</b> | 1.6 (0.6)        | 1.7 (0.5)    | 3.3 (0.8)        | 3.3 (0.8)    | 2.5 (0.8)         | 2.7 (0.8)    | 3 (0.7)          | 3.1 (0.7)    |
| HOMA-B                               | 38.2 (26.5)      | 40.9 (26.8)  | 101 (53)         | 99.7 (48.7)  | 62.6 (37.4)       | 68.2 (40.4)  | 93.8 (43.8)      | 95.4 (42.8)  |
| HOMA-IR                              | 2.7 (1.5)        | 2.8 (1.7)    | 4.2 (1.6)        | 3.9 (1.4)    | 3.8 (1.6)         | 3.9 (2.5)    | 2.7 (0.9)        | 2.6 (0.8)    |
| Serum cholesterol, mg/dl             | 186.5 (43.3)     | 191 (42.3)   | 175.7 (39.6)     | 177.3 (39)   | 206.9 (42.8)      | 206.5 (46.3) | 172.6 (40.3)     | 183.6 (41)   |
| Insulin at registration, %           | 28.0             | 20.4         | 12.7             | 8.1          | 16.0              | 12.6         | 5.4              | 4.9          |
| Metformin at registration, %         | 41.2             | 34.6         | 77.4             | 65.8         | 58.3              | 35.4         | 56.4             | 73.9         |
| Sulfonylureas at registration,%      | 35.7             | 28.7         | 48.5             | 39.8         | 42.9              | 27.6         | 36.0             | 45.1         |

Note: \* Variables in bold are those used for clustering

**Supplemental Table S2 : Characteristics of type 2 diabetes sub-groups with < 1 year and < 3 years of diabetes duration**

|                               | Cluster 1 (SIDD) |             | Cluster 2 (IROD) |             | Cluster 3 (CIRDD) |              | Cluster 4 (MARD) |             |
|-------------------------------|------------------|-------------|------------------|-------------|-------------------|--------------|------------------|-------------|
|                               | < 1 year         | < 3 years   | < 1 year         | < 3 years   | < 1 year          | < 3 years    | < 1 year         | < 3 years   |
| Duration of diabetes          |                  |             |                  |             |                   |              |                  |             |
| N                             | 1883             | 3379        | 1637             | 3305        | 702               | 1531         | 2283             | 4644        |
| Frequency, %                  | 28.9             | 26.3        | 25.2             | 25.7        | 10.8              | 11.9         | 35.1             | 36.1        |
| Men, %                        | 66               | 66.4        | 58.7             | 59.3        | 74.4              | 74.7         | 58.5             | 57.4        |
| Age at diagnosis, years       | 42.2 (11.9)      | 42.5(11.4)  | 46 (11.9)        | 46.3(10.7)  | 41.5 (10.5)       | 42(10.2)     | 51 (11.1)        | 50.4(10.5)  |
| BMI, kg/m <sup>2</sup>        | 24.8 (3.4)       | 24.9(3.5)   | 32.7 (3.4)       | 32.7(4.2)   | 26.6 (3.2)        | 26.5(3.2)    | 25.7 (2.9)       | 25.9(3.0)   |
| Waist Circumference, cm       | 89.5 (8.6)       | 89.8(8.8)   | 107.7 (8.6)      | 108.1(8.9)  | 94.5 (8.2)        | 94.8(8.2)    | 92 (7.4)         | 92.3(7.5)   |
| Glycated hemoglobin, %        | 11.3 (2.1)       | 10.9(2.1)   | 8.6 (2.1)        | 8.3(1.8)    | 10.0 (2.2)        | 9.3(2)       | 7.5 (1.5)        | 7.3(1.3)    |
| Glycated hemoglobin, mmol/mol | 100.0            | 96.0        | 70.0             | 67.0        | 86.0              | 78.0         | 58.0             | 56.0        |
| Serum triglycerides, mg/dl    | 147.6 (55.6)     | 148.3(58.8) | 157.1 (55.6)     | 155.1(59.6) | 364.7 (104.5)     | 350.2(102.3) | 135.1 (51.5)     | 135.5(50.1) |
| HDL Cholesterol, mg/dl        | 39.3 (8.7)       | 39.7(8.8)   | 37.9 (8.7)       | 37.9(7.7)   | 36.3 (7.8)        | 36(7.4)      | 41.9 (9.1)       | 42.1(9.0)   |
| C-peptide fasting, pmol/ml    | 0.8 (0.3)        | 0.8(0.3)    | 1.5 (0.3)        | 1.5(0.4)    | 1.2 (0.4)         | 1.2(0.4)     | 1.1 (0.3)        | 1.1(0.3)    |
| C-peptide stimulated, pmol/ml | 1.6 (0.6)        | 1.7(0.6)    | 3.3 (0.6)        | 3.3(0.8)    | 2.5 (0.8)         | 2.6(0.8)     | 3.0 (0.7)        | 3.0(0.7)    |
| HOMA-B                        | 38.5 (27.7)      | 39.0 (27.4) | 101.2 (27.7)     | 102.8(52.5) | 57.7 (36.2)       | 64.2(38)     | 94.8 (44.2)      | 94.9(42.9)  |
| HOMA-IR                       | 2.8 (1.5)        | 2.8(1.6)    | 4.2 (1.5)        | 4.1(1.6)    | 3.9 (2.1)         | 3.8(1.8)     | 2.7 (0.9)        | 2.7(0.8)    |
| Serum cholesterol, mg/dl      | 190 (43.4)       | 188.8(43)   | 181.3 (43.4)     | 177.7(39.9) | 214.4 (46.4)      | 207.6(44.1)  | 179.1 (42.5)     | 178.4(41.3) |

**Supplemental Table S3: Validation of cluster without including HbA1c in the model**

|                                      | <b>Cluster 1<br/>(SIDD)</b> | <b>Cluster 2<br/>(IROD)</b> | <b>Cluster 3<br/>(CIRDD)</b> | <b>Cluster<br/>(MARD)</b> |
|--------------------------------------|-----------------------------|-----------------------------|------------------------------|---------------------------|
| N                                    | 6250                        | 4171                        | 2574                         | 6089                      |
| Frequency, %                         | 32.7                        | 21.9                        | 13.5                         | 31.9                      |
| Men, %                               | 64.5                        | 60.0                        | 74.2                         | 64.5                      |
| <b>Age at diagnosis, years</b>       | 42.5 (10.1)                 | 44.8 (10.0)                 | 41.5 (9.4)                   | 53.1 (9.6)                |
| <b>BMI, kg/m<sup>2</sup></b>         | 24.6 (3.3)                  | 33.4 (3.9)                  | 26.5 (3.0)                   | 26.7 (2.9)                |
| <b>Waist Circumference, cm</b>       | 89 (8.2)                    | 109.6 (8.6)                 | 94.8 (7.8)                   | 94.7 (7.1)                |
| <b>Serum triglycerides, mg/dl</b>    | 138.9 (53.7)                | 156.8 (61.8)                | 339.1 (103.1)                | 141 (50.9)                |
| <b>HDL Cholesterol, mg/dl</b>        | 40.8 (9.1)                  | 37.8 (7.6)                  | 35.9 (7.4)                   | 41.6 (8.9)                |
| <b>C-peptide fasting, pmol/ml</b>    | 0.8 (0.2)                   | 1.5 (0.4)                   | 1.2 (0.3)                    | 1.2 (0.3)                 |
| <b>C-peptide stimulated, pmol/ml</b> | 1.8 (0.6)                   | 3.2 (0.8)                   | 2.5 (0.8)                    | 3.2 (0.7)                 |
| HOMA-B                               | 51.6 (35.3)                 | 98.1 (51.6)                 | 64.5 (39.5)                  | 96.1 (47.4)               |
| HOMA-IR                              | 2.4 (1.3)                   | 4.1 (1.6)                   | 3.7 (1.8)                    | 3.1 (1.2)                 |
| Glycated hemoglobin, %               | 9.4 (2.4)                   | 8.4 (1.8)                   | 9.2 (2.1)                    | 7.9 (1.8)                 |
| Serum cholesterol, mg/dl             | 182.7 (42.5)                | 176.2 (39.6)                | 204 (43.7)                   | 179.9 (42)                |

Note: \*Variables in bold are those used for clustering

**Supplementary Table S4: Cox hazards ratio for reaching target goal**

| Label | %    | HR(CI-95%)*        | P      |
|-------|------|--------------------|--------|
| SIDD  | 26   | 0.69 (0.64 – 0.75) | <0.001 |
| IROD  | 22.6 | 0.83 (0.76 – 0.90) | <0.001 |
| CIRDD | 23.7 | 0.73 (0.66 – 0.80) | <0.001 |
| MARD  | 19.5 | 1                  | -      |

\* adjusted for age, following MARD as the reference group, HR = 1.0

**Supplemental Table S5 : Patient characteristics of Scandinavian population, an outcome of Ahlqvist et al clustering**

|                               | <b>SIDD</b>  | <b>SIRD</b>   | <b>MOD</b>   | <b>MARD</b>  |
|-------------------------------|--------------|---------------|--------------|--------------|
| N                             | 1575         | 1373          | 1942         | 3513         |
| Frequency, %                  | 17.5         | 15.3          | 21.6         | 39.1         |
| Men, %                        | 64.8         | 58.8          | 52.1         | 62.0         |
| BMI, kg/m <sup>2</sup>        | 28.86(4.77)  | 33.85(5.24)   | 35.71(5.43)  | 27.94(3.44)  |
| Age at diagnosis, years       | 56.74(11.14) | 65.25(9.34)   | 48.96(9.54)  | 67.37(8.55)  |
| Glycated hemoglobin, %        | 11.5 (3.9)   | 7.1(3.6)      | 7.4 (3.6)    | 6.7 (3.1)    |
| Glycated hemoglobin, mmol/mol | 102.0        | 54.0          | 57.0         | 50.0         |
| HOMA-B                        | 47.64(28.93) | 150.47(47.20) | 95.03(32.45) | 86.59(26.37) |
| HOMA-IR                       | 3.18 (1.73)  | 5.54 (2.74)   | 3.35 (1.21)  | 2.55 (0.84)  |

**Supplemental Table S6: Patient characteristics of Asian Indian population applying Ahlqvist et al clustering phenotypes**

|                                      | <b>SIDD</b>   | <b>SIRD</b>   | <b>MOD</b>   | <b>MARD</b>  |
|--------------------------------------|---------------|---------------|--------------|--------------|
| <b>N</b>                             | 4836          | 3219          | 7280         | 3749         |
| <b>Frequency, %</b>                  | 25.3          | 16.9          | 38.1         | 19.6         |
| <b>Men, %</b>                        | 69.1          | 54.9          | 64.5         | 57.2         |
| <b>BMI, kg/m<sup>2</sup></b>         | 24.9 (3.1)    | 32.4 (4.5)    | 25.5 (3)     | 30.1 (4.3)   |
| <b>Age at diagnosis, years</b>       | 41.9 (10.7)   | 44.1 (10.7)   | 48 (10.4)    | 50.2 (10.1)  |
| <b>Glycated hemoglobin, %</b>        | 11.1 (1.7)    | 9.8 (1.7)     | 7.4 (1.1)    | 6.9 (1.1)    |
| <b>Glycated hemoglobin, mmol/mol</b> | 98.0          | 84.0          | 57.0         | 52.0         |
| <b>HOMA-B</b>                        | 35.5 (19.9)   | 60.6 (27.4)   | 76.9 (26)    | 148.4 (44.7) |
| <b>HOMA-IR</b>                       | 2.9 (1.0)     | 4.9 (2.4)     | 2.5 (0.8)    | 3.3 (1.0)    |
| Waist Circumference, cm              | 90.8 (8.6)    | 105.9 (10.5)  | 92.4 (8.4)   | 101.7 (10.3) |
| Serum triglycerides, mg/dl           | 184.5 (102.2) | 193.3 (101.8) | 160.7 (85.7) | 151.8 (74.1) |
| HDL Cholesterol, mg/dl               | 39.6 (8.9)    | 38.3 (8.2)    | 40.6 (8.9)   | 39.5 (8.5)   |
| C-peptide fasting, pmol/ml           | 0.9 (0.3)     | 1.5 (0.4)     | 1.0 (0.3)    | 1.4 (0.4)    |
| C-peptide stimulated, pmol/ml        | 1.9 (0.7)     | 2.9 (0.8)     | 2.7 (0.8)    | 3.5 (0.7)    |
| Serum cholesterol, mg/dl             | 194.1 (44.1)  | 188.2 (42.6)  | 179.9 (41.2) | 171.4 (39.9) |

Note: \* Variables in bold are those used for clustering
